# Supplementary material for: GDF15 promotes EMT and metastasis in colorectal cancer
Source: PubMed Central journal article supplement (PMC4808038; doi:10.18632/oncotarget.6205), 2015-10-22
Supplement: oncotarget-07-0860-s001.pdf [file oncotarget-07-0860-s001.pdf]

**SUPPLEMENTARY TABLE****Supplementary Table S1: Oligas used in this study**

| Oligos                            | Sequence                                                   |
|-----------------------------------|------------------------------------------------------------|
| GAPDH-primer-F                    | ACCACAGTCCATGCCATCAC                                       |
| GAPDH-primer-R                    | TCCACCACCCTGTTGCTGTA                                       |
| GDF15-primer-F                    | TCAGATGCTCCTGGTGTTC                                        |
| GDF15-primer-R                    | GATCCCAGCCGCACTTCTG                                        |
| GDF15-shRNA-F                     | CCGGGCTCCAGACCTATGATGACTTCTCGAGAAGTCATCATAGGTCTGGAGCTTTTTG |
| GDF15-shRNA-R<br>(TRCN0000058388) | AATTCAAAAAGCTCCAGACCTATGATGACTTCTCGAGAAGTCATCATAGGTCTGGAGC |
| SMAD2-shRNA-F                     | CCGGCGATTAGATGAGCTTGAGAACTCGAGTTTCTCAAGCTCATCTAATCGTTTTTG  |
| SMAD2-shRNA-R<br>(TRCN0000040036) | AATTCAAAAACGATTAGATGAGCTTGAGAACTCGAGTTTCTCAAGCTCATCTAATCG  |
| SMAD3-shRNA-F                     | CCGGCATCTCCTACTACGAGCTGAACTCGAGTTCAGCTCGTAGTAGGAGATGTTTTTG |
| SMAD3-shRNA-R<br>(TRCN0000020012) | AATTCAAAAACATCTCCTACTACGAGCTGAACTCGAGTTCAGCTCGTAGTAGGAGATG |
